# Supplementary material for: A meta-analysis and systematic review of single vs. multimodal neuroimaging techniques in the classification of psychosis
Source: PubMed Central journal article supplement (PMC10618094; doi:10.1038/s41380-023-02195-9), 2023-08-10
Supplement: 41380_2023_2195_MOESM1_ESM.pdf [file 41380_2023_2195_MOESM1_ESM.pdf]

| Study                     | Psychosis Sample (N) | Control Sample (N) | Imaging                                                  | CV                 | Statistical method      | Sensitivity          | Specificity          | Age Psychosis | Age Controls | Gender Psychosis (%F) | Gender Controls (%F) | CPZ Equivalent | PANSS Positive | PANSS Negative | PANSS Total | Illness Duration (months) | MRI Scanner                                               | TR/TE (ms)                     | Feature Size | Diagnosis | Notes                                                   |
|---------------------------|----------------------|--------------------|----------------------------------------------------------|--------------------|-------------------------|----------------------|----------------------|---------------|--------------|-----------------------|----------------------|----------------|----------------|----------------|-------------|---------------------------|-----------------------------------------------------------|--------------------------------|--------------|-----------|---------------------------------------------------------|
| Davatzikos et al., 2005   | 69                   | 79                 | RAVENS map                                               | LOO                | SVM                     | 0.74                 | 0.87                 | 29.9          | 28.2         | 33%                   | 48%                  | NA             | NA             | NA             | NA          | 59.4                      | 3T GE Signa                                               | 35/6                           | NA           | SCZ       | I                                                       |
| Karageorgiou et al., 2011 | 28                   | 47                 | GMV                                                      | LOO                | LDA                     | 0.66                 | 0.74                 | 24.32         | 26.38        | 21%                   | 43%                  | NA             | NA             | NA             | NA          | 26.4                      | Siemens 3T Trio, Siemens 1.5T Sonata, Siemens 1.5T Avanto | 2530/3.79, 20/6, 12/4.76       | NA           | SCZ       | I<br>MCIC Dataset<br>o                                  |
| Bansal et al., 2012       | 65                   | 40                 | Surface morphology                                       | LOO+TTS            | Hierarchical Clustering | 0.91                 | 0.95                 | 42.16         | 32.42        | 63%                   | 55%                  | NA             | NA             | NA             | NA          | NA                        | 1.5T GE Signa LS                                          | 24/5                           | 10000        | SCZ       | I<br>Wexler et al., 2009 Dataset                        |
| Niewehuis, et al., 2012   | 155                  | 122                | VBM (including striatum) GMD                             | LOO                | SVM                     | 0.72 (I)<br>0.71 (E) | 0.68 (I)<br>0.7 (E)  | 27.18         | 27.18        | 48%                   | 48%                  | NA             | 15.34          | 18.6           | 71.56       | 123.6                     | 5T Phillips NT                                            | 30/4.6                         | 157256       | SCZ       | I/E<br>Boos et al., 2012 Dataset<br>o                   |
| Borgwardt et al., 2013    | 23                   | 22                 | RAVENS map                                               | 10F                | SVM                     | 0.87                 | 0.86                 | 26.78         | 23           | 26%                   | 41%                  | NA             | NA             | NA             | NA          | NA                        | 1.5T Siemens Magnetom Vision                              | 9.7/4                          | 410          | FEP       | I<br>FePsy Dataset                                      |
| Iwabuchi et al., 2013     | 19                   | 20                 | WMV or GMV                                               | LOO                | SVM                     | 0.66                 | 0.73                 | 33.2          | 32           | 26%                   | 25%                  | NA             | NA             | NA             | NA          | 92.4                      | 7T Phillips Achieva                                       | 15/5.6                         | NA           | SCZ       | I<br>o                                                  |
| Schnack et al., 2014      | 46                   | 43                 | VBM GMD                                                  | LOO                | SVM                     | 0.69 (I)<br>0.66 (E) | 0.82 (I)<br>0.85 (E) | 31            | 33.8         | 28%                   | 51%                  | NA             | NA             | NA             | NA          | 86.4                      | 3T Phillips Achieva                                       | 10/4.6                         | NA           | SCZ       | I/E<br>Scheewe et al., 2012 Dataset                     |
| Sabuncu et al., 2015      | 50                   | 73                 | VBM                                                      | K Fold             | SVM                     | 0.6                  | 0.62                 | 34.3          | 34.1         | 18%                   | 18%                  | NA             | NA             | NA             | NA          | NA                        | NA                                                        | NA                             | Varied       | SCZ       | I<br>Cobre Dataset                                      |
| Janousova et al., 2016    | 52                   | 52                 | GMV, DBM                                                 | LOO                | SVM                     | 0.73                 | 0.8                  | 23            | 23           | 0%                    | 0%                   | NA             | NA             | NA             | NA          | NA                        | 1.5T Siemens Symphony                                     | 1700/3.93                      | 2673601      | FES       | I<br>BRNO dataset                                       |
| Lu et al., 2016           | 41                   | 41                 | TBV or WMV and GMV--AAL atlas                            | LOO                | SVM                     | 0.80                 | 0.85                 | 25.68         | 26.02        | 41%                   | 36%                  | NA             | 24.98          | 23.29          | 43.07       | NA                        | 3T Phillips                                               | 7.6/3.7                        | NA           | SCZ       | I                                                       |
| Pinaya et al., 2016       | 143                  | 83                 | Cortical thickness and volume                            | K Fold             | DBN                     | 0.76                 | 0.64                 | 37.12         | 35.49        | 34%                   | 33%                  | NA             | 12.74          | 16.92          | 58.59       | 160.68                    | 1.5 Siemens                                               | 3000/3.42                      | NA           | SCZ       | I<br>UNIFESP Deep<br>o                                  |
| Yun et al., 2016          | 27                   | 27                 | Cortical thickness or surface area                       | TTS                | SVM                     | 0.92                 | 0.91                 | 22.48         | 24.07        | 66%                   | 40%                  | 327.47         | 22.81          | 18.81          | 73          | 7.2                       | 3T Siemens Magnetom Trio                                  | 670/1.89                       | 14           | FEP       | I                                                       |
| Salvador et al., 2017     | 128                  | 127                | GMV/WMV                                                  | 10F                | SVM+many                | 0.65                 | 0.3                  | 41.5          | 39.8         | 42%                   | 42%                  | 824            | 16.9           | 21.4           | 72.6        | 220.8                     | 1.5 GE Signa                                              | 2000/4                         | 7626         | Scz       | I                                                       |
| Chin et al., 2018         | 57                   | 28                 | VBM GMD HO atlas                                         | TTS                | SVM                     | 0.92                 | 0.74                 | 41.3          | 41.3         | 33%                   | 33%                  | 200.4          | 9.82           | 8.63           | 37.9        | 88.56                     | 3T Phillips Achieva                                       | 8400/3.3                       | 64           | SCZ       | I                                                       |
| Dwyer et al., 2018        | 71                   | 74                 | GMV                                                      | K Fold             | SVM                     | 0.7 (I)<br>0.63 (E)  | 0.66 (I)<br>0.75 (E) | 33.9          | 35.8         | 20%                   | 31%                  | 346.3          | 11.9           | 15.2           | NA          | 54                        | 3T Siemens Tim Trio                                       | 2530/(1.64,3.5,5.36,7.22,9.08) | NA           | SCZ       | I/E<br>MRN, Cobre                                       |
| Monte-Rubio et al., 2018  | 72                   | 74                 | WMV, GMV                                                 | K Fold             | GP                      | 0.63                 | 0.62                 | 38.16         | 35.82        | 19%                   | 31%                  | NA             | NA             | NA             | NA          | NA                        | 3T Siemens Tim Trio                                       | 2530/(1.64,3.5,5.36,7.22,9.08) | NA           | SCZ       | I<br>Cobre                                              |
| Pinaya et al., 2018       | 35                   | 40                 | Cortical thickness and volume                            | S-10F              | DA                      | 0.53                 | 0.65                 | 25.5          | 26.7         | 26%                   | 48%                  | NA             | NA             | NA             | NA          | NA                        | 3T Siemens Magnetom                                       | 9.7/4, 40/3                    | 104          | SCZ       | I<br>NUSDAST and HCP Datasets Deep<br>o                 |
| Schwarz et al., 2019      | 66                   | 66                 | VBM GMD and mean thickness, sum surface area, and volume | Leave One Site Out | SVM+many                | 0.65                 | 0.77                 | 33.4          | 32.9         | 30%                   | 24%                  | NA             | NA             | NA             | NA          | NA                        | 3T GE                                                     | NA                             | 152          | SCZ       | E<br>UNIBA, CIMH, HUBIN, Kasp, UIO Datasets Pooled<br>♦ |
| Vyskovsky et al., 2019    | 52                   | 52                 | GMD, local volume change                                 | LOO                | RSENN                   | 0.63                 | 0.68                 | 23            | 23           | 0%                    | 0%                   | NA             | NA             | NA             | NA          | NA                        | 1.5T Siemens Symphony                                     | 1700/3.93                      | NA           | FES       | I<br>BRNO Deep                                          |
| Winterburn et al., 2019   | 50                   | 50                 | VBM GMD or RAVENS map or                                 | 10F                | SVM+many                | 0.65                 | 0.61                 | 25.8          | 23.8         | 38%                   | 36%                  | NA             | 23.9           | 24.3           | NA          | 8.775                     | 3T GE                                                     | 13.4/5.7                       | 1068592      | FEP       | E<br>INNN, NUSDAST,                                     |

|                        |     |     | cortical thickness                                          |           |           |                      |                      |       |       |       |       |       |       |       |       |       |                              |                                |        |        | CAMH Datasets Pooled ♦                                   |
|------------------------|-----|-----|-------------------------------------------------------------|-----------|-----------|----------------------|----------------------|-------|-------|-------|-------|-------|-------|-------|-------|-------|------------------------------|--------------------------------|--------|--------|----------------------------------------------------------|
| Xiao et al., 2019      | 163 | 163 | Cortical thickness or surface area                          | 10F       | SVM       | 0.80                 | 0.86                 | 23.54 | 23.61 | 55%   | 47%   | NA    | 18.73 | 24.71 | 95.58 | 12.21 | 3T GE Excite                 | 8.5/3.4                        | 136    | DN-FES | I                                                        |
| Chang et al., 2020     | 88  | 44  | GMV or WMV                                                  | TTS       | EDNN      | 0.84 (I)<br>0.81 (E) | 0.89 (I)<br>0.59 (E) | 45.8  | 45.8  | 58.3% | 58.3% | NA    | NA    | NA    | 72.3  | 273.6 | 3T Siemens Magnetom Tim Trio | 2530/3.5                       | NA     | SCZ    | I/E Deep                                                 |
| Chen et al., 2020      | 34  | 34  | GMV, WMV                                                    | LOO       | SVM       | 0.74                 | 0.69                 | 36.85 | 39.53 | 20%   | 32%   | NA    | NA    | NA    | NA    | NA    | 3T Siemens Tim Trio          | 2530/(1.64,3.5,5.36,7.22,9.08) | Varied | SCZ    | I Cobre                                                  |
| Nemoto et al., 2020    | 129 | 404 | Cortical regional volume                                    | TTS       | LDA       | 0.6 (I)<br>0.63 (E)  | 0.81 (I)<br>0.75 (E) | 36.5  | 35.5  | 39%   | 54%   | 547.8 | NA    | NA    | NA    | 141.6 | 3T GE Signa Excite           | 4200/12.6                      | NA     | SCZ    | I/E Osaka ABC, Tokyo, Toyama, Kyushu Datasets Pooled ♦ ° |
| Vieira et al., 2020    | 110 | 110 | GMV and VBCT or cortical thickness and surface based volume | 10F       | DNN       | 0.59 (I)<br>0.7 (E)  | 0.60 (I)<br>0.38 (E) | 28.5  | 29.7  | 38%   | 38%   | NA    | NA    | NA    | NA    | 13.2  | 3T                           | 8.2/3.7                        | 169    | FEP    | I/E Pelayo-Terán et al., 2008) Dataset Deep Pooled ♦     |
| Yamamoto et al., 2020  | 50  | 51  | VBM GMD                                                     | 10F       | SVM       | 0.61 (I)<br>0.62 (E) | 0.82 (I)<br>0.83 (E) | 38.8  | 36.5  | 48%   | 43%   | NA    | 16    | 16.9  | 67.3  | 176.4 | 3T Siemens Verio             | 1900/2.48                      | NA     | SCZ    | I/E Nagoya and Toyama Dataset Pooled ♦ °                 |
| Latha et al., 2021     | 112 | 84  | Radiomic features                                           | K Folds   | Fuzzy SVM | 0.91                 | 0.89                 | 38.64 | 35.82 | 33%   | 39%   | NA    | 15.4  | 15.44 | NA    | NA    | 3T Siemens Tim Trio          | 2530/(1.64,3.5,5.36,7.22,9.08) | Varied | SSD    | I NAMIC, Cobre Dataset Pooled                            |
| Zhou et al., 2021      | 49  | 34  | Cortical thickness                                          | Nested CV | SVM       | 0.73                 | 0.65                 | 16.02 | 16.32 | 51%   | 55%   | NA    | NA    | NA    | NA    | 6.24  | 3T GE Signa                  | 8348/3272                      | 68     | SCZ    | I °                                                      |
| Vyskovsky et al., 2022 | 52  | 52  | GMD, local volume change, intensities                       | TTS       | CNN       | 0.58                 | 0.54                 | 23    | 23    | 0%    | 0%    | NA    | NA    | NA    | NA    | NA    | 1.5T Siemens Symphony        | 1700/3.93                      | NA     | FES    | I BRNO Deep                                              |
| Zhu et al., 2022       | 10  | 28  | PCA of GMV and cortical thickness                           | 10F       | SVM       | 0.7 (I)              | 0.79 (I)             | 31.44 | 29.66 | 40%   | 41%   | 698.3 | 16.47 | 20.38 | NA    | 87.36 | 3T GE Discovery              | 8.46/3.25                      | 554992 | SCZ    | I/E °                                                    |

**Supplemental Table 1.** Structural MRI datasets Statistical method: SVM = Support vector machine. FEP=First Episode Psychosis. TTS = Train Test Split. FES = First Episode Schizophrenia. SCZ = Schizophrenia. CV = cross validation. DN-FES = drug naïve first episode schizophrenia. LOO = leave one out. S-10F = stratified 10 fold. EDNN: explainable deep neural network. TR/TE = repetition time/echo time. WMV = white matter volume. GMV = gray matter volume. VBM = voxel based morphometry. CNN = convolutional neural network. 10F = 10 fold, RAVENS = regional analysis of volumes examined in normalized space. TTS = train test split. GMD = gray matter densities. WMV or GMV = a model was trained on either white matter volume or gray matter volume. The resulting values are the average between each model. TBV = total brain volume as measured by the sum of total white and gray matter volume. WMV and GMV--AAL atlas = white matter and gray matter volumes using an ROI analysis from the AAL atlas. VBM GMD HO atlas = voxel based morphometry to calculate gray matter densities using the Harvard-Oxford cortical and subcortical atlas. “and” = all measures were included in the model. “or” = each measure was used to train a model. PCA = principal component analysis. DBM=deformation based morphometry. GP=gaussian process. RSENN = random subspace ensemble neural network classifier. DA = deep autoencoders. DBN = deep belief network model. E = external data used for testing. I = internal training folds used for testing. Deep = manuscripts that use some form of deep learning. Pooled = data was pooled together for model training. ♦ indicates the pooled dataset did not overlap and was used for the primary analysis. ° = manuscript was kept in the secondary analysis after outlier exclusion.

| Study                       | Psychosis Sample (N) | Control Sample (N) | Imaging        | CV               | Statistical method | Sensitivity       | Specificity       | Age Psychosis | Age Controls | Gender Psychosis (%F) | Gender Controls (%F) | CPZ Equivalent | PANSS Positive | PANSS Negative | PANSS Total | Illness Duration (months) | MRI Scanner         | TR/TE (ms) | Feature Size | Addressing Motion                                                       | Diagnosis | Notes                           |
|-----------------------------|----------------------|--------------------|----------------|------------------|--------------------|-------------------|-------------------|---------------|--------------|-----------------------|----------------------|----------------|----------------|----------------|-------------|---------------------------|---------------------|------------|--------------|-------------------------------------------------------------------------|-----------|---------------------------------|
| Rathi et al., 2010          | 21                   | 20                 | FA, MD         | TTS              | KNN                | 0.79 (0.69, 0.86) | 0.78 (0.68, 0.85) | 21.21         | 22.47        | 19%                   | 25%                  | NA             | NA             | NA             | NA          | NA                        | 3T                  | NA         | NA           | NA                                                                      | FES       | ◦                               |
| Ardekani et al., 2011       | 50                   | 50                 | FA             | TTS 50%          | LDA                | 0.96 (0.96, 0.96) | 0.96 (0.92, 1)    | 30.3          | 31.2         | 32%                   | 32%                  | NA             | NA             | NA             | NA          | NA                        | 1.5T GE             | 10000      | 13           | NA                                                                      | SCZ       | Robinson et al., 2006 Dataset   |
| Pettersson-Yeo et al., 2013 | 19                   | 19                 | FA             | LOO              | SVM                | 0.68              | 0.63              | 22.42         | 23.32        | 52%                   | 52%                  | 4538.49        | 12.84          | 14             | 52.53       | NA                        | 3T GE Sigma         | 1300/104.5 | 5516         | ECC, head motion, b-matrix reorientation and rejection of data outliers | FEP       | ◦                               |
| Chen et al., 2018           | 60                   | 60                 | Generalized FA | TTS              | KNN                | 0.75              | 0.76              | 29.36         | 29.12        | 50%                   | 50%                  | 298.61         | 13.425         | 15.705         | NA          | 276.3                     | 3T Siemens Tim Trio | 9600/130   | 76           | ECC                                                                     | SCZ       | ◦                               |
| Mikolas et al., 2018        | 77                   | 77                 | FA             | LOO              | SVM                | 0.60              | 0.65              | 28.51         | 28.32        | 44%                   | 44%                  | 337            | 13.9           | 15.7           | 62.4        | 3                         | 3T Siemens          | 8300/84    | 129154       | Visually inspected for excessive motion                                 | FES       | ESO dataset ◦                   |
| Deng et al., 2019           | 65                   | 60                 | FA, RD, AD, MD | TTS 20% with LOO | RF                 | 0.72 (0.67, 0.76) | 0.75 (0.75, 0.75) | 27.6          | 27.2         | 50%                   | 48%                  | 338.9          | 9.69           | 11.55          | 45.20       | 14.57                     | 3T Phillips Achieva | 8300/86    | 35           | removed motion and ECC                                                  | FES       | ◦                               |
| Wang et al., 2020           | 28                   | 30                 | FA             | Kfold            | SVM                | 0.59 (0.46, 0.72) | 0.78 (0.73, 0.83) | 22.32         | 22.47        | 39%                   | 60%                  | NA             | 14.25          | 9.39           | NA          | 42.72                     | 3T Siemens SKYRA    | 6400/86    | 5516         | ECC and motion distortion                                               | SOC       | ◦                               |
| Huang et al., 2020          | 18                   | 19                 | FA             | LOO              | NSEAL              | 0.67              | 0.71              | 31.4          | 33.9         | 44%                   | 31%                  | NA             | NA             | NA             | NA          | NA                        | 3T                  | 11000/76   | Varied       | ECC                                                                     | SCZ       | Deep ◦                          |
| Morgan et al., 2021         | 65                   | 59                 | FA/MD          | 200fold          | GPLC               | 0.54 (0.53, 0.54) | 0.78 (0.77, 0.79) | 27.9          | 29.2         | 33%                   | 61%                  | NA             | 9.4            | 10.3           | NA          | NA                        | 3T Siemens          | NA         | NA           | Corrected movement, ECC, and susceptibility distortions                 | SCZ       | Maastricht GROUP Dataset Pooled |

**Supplemental Table 2.** DTI datasets Statistical method: SVM = Support vector machine. LDA= linear discriminant analysis. RF = random forest. KNN = K nearest neighbors. TTS = Train Test Split. TBSS = tract-based spatial statistics. FA = fractional anisotropy, AD = axial diffusivity, MD = mean diffusivity, RD = radial diffusivity. EPI = Echo Planar Imaging, FES = First Episode Schizophrenia, FEP = First Episode Psychosis, SCZ= Schizophrenia, LOO = leave one out TTS = train test split. SOC = schizophrenia with obsessive compulsive disorder comorbidity. CV = cross validation. ECC = eddy current correction. NSEAL = node level structure embedding and alignment learning. GPLC = gaussian process linear covariance model. All DTI studies only used internal training folds for model prediction. Deep = manuscripts that use a form of deep learning. Pooled = data was pooled together for model training. ♦ indicates the pooled dataset did not overlap and was used for the primary analysis. ◦ = manuscript was kept in the secondary analysis after outlier exclusion.

| Study                     | Psychosis Sample (N) | Control Sample (N) | CV      | Statistical method | Sensitivity          | Specificity          | Age Psychosis | Age Controls | Gender Psychosis (%F) | Gender Controls (%F) | CPZ Equivalent | PANSS Positive | PANSS Negative | PANSS Total | Illness Duration (months) | MRI Scanner                  | TR/TE (ms) | Feature Size | Minutes Rest | Diagnosis               | Notes                                                                   |
|---------------------------|----------------------|--------------------|---------|--------------------|----------------------|----------------------|---------------|--------------|-----------------------|----------------------|----------------|----------------|----------------|-------------|---------------------------|------------------------------|------------|--------------|--------------|-------------------------|-------------------------------------------------------------------------|
| Tang et al., 2012         | 22                   | 22                 | LOO     | PCA SVM            | 0.86                 | 1                    | 24.54         | 26.09        | 31%                   | 31%                  | NA             | NA             | NA             | 75.64       | 38.52                     | 1.5 T GE Signa               | 2000/40    | 4005         | 6            | SCZ                     | I<br>o                                                                  |
| Arbabshirani et al., 2013 | 28                   | 28                 | TTS 40% | KNN                | 0.73                 | 0.88                 | NA            | NA           | NA                    | NA                   | NA             | NA             | NA             | NA          | NA                        | 3T Siemens Allegra           | 1500/27    | 36           | 5            | SCZ                     | I<br>Deep<br>o                                                          |
| Fekete et al., 2013       | 8                    | 10                 | LOO     | SVM+many           | 0.85                 | 0.9                  | 44.1          | 41.8         | 0                     | 0                    | NA             | NA             | NA             | NA          | NA                        | 3T GE                        | 3000/30    | Varied       | 10           | SCZ                     | I<br>NAMIC                                                              |
| Hu et al., 2013           | 10                   | 10                 | LOO     | SVM+many           | 0.75                 | 0.8                  | 44.1          | 41.8         | 0                     | 0                    | NA             | NA             | NA             | NA          | NA                        | 3T GE                        | 3000/30    | 63903        | 10           | SCZ                     | I<br>NAMIC                                                              |
| Su et al., 2013           | 32                   | 32                 | LOO     | SVM                | 0.82                 | 0.78                 | 24            | 25.01        | 22%                   | 28%                  | NA             | NA             | NA             | 80.06       | NA                        | 1.5T GE Signa                | 2000/40    | 6670         | 6            | SCZ                     | I<br>o                                                                  |
| Yu et al., 2013a          | 32                   | 38                 | OAR     | SVM                | 0.93                 | 0.91                 | 24            | 24.44        | 21%                   | 28%                  | NA             | NA             | NA             | 80.06       | 289.2                     | 1.5T GE Signa                | 2000/45    | 6670         | 6            | SCZ                     | I                                                                       |
| Yu et al., 2013b          | 24                   | 22                 | OAR     | SVM                | 0.76                 | 0.88                 | 25.36         | 25.48        | 50%                   | 50%                  | NA             | 21.8           | 22.38          | 87.14       | NA                        | 1.5T GE Signa                | 2000/40    | 6670         | 6            | SCZ                     | I<br>o                                                                  |
| Chyzhyk et al., 2015      | 40                   | 28                 | 10 Fold | SVM                | 0.61                 | 0.65                 | 38.50         | 39           | 41%                   | 39%                  | 523            | NA             | NA             | NA          | 192                       | 3T Siemens Trio              | 2500/24    | 10000        | 10           | SCZ                     | Shinn et al 2013 Dataset                                                |
| Kaufmann et al., 2015     | 71                   | 196                | LOO     | LDA                | 0.42                 | 0.92                 | 28.2          | 31.5         | 41%                   | 42%                  | NA             | 13.3           | 14.8           | 58.1        | NA                        | 3T GE Signa                  | 2638/30    | 1081         | 9            | SCZ                     | I<br>o                                                                  |
| Kim et al., 2016          | 50                   | 50                 | K Fold  | DNN                | 0.74                 | 0.78                 | 35.94         | 35.5         | 14%                   | 32%                  | NA             | 14.36          | 15             | 58.78       | 180                       | 3T Siemens Trio              | 2000/29    | 6670         | 5            | SCZ                     | I<br>Cobre<br>Deep                                                      |
| Rashid et al., 2016       | 60                   | 61                 | 10 Fold | SVM                | 0.81                 | 0.68                 | 35.85         | 35.44        | 22%                   | 46%                  | NA             | NA             | NA             | NA          | NA                        | 3T Siemens Allegra           | 1500/27    | 1176         | 5            | SCZ                     | I<br>o                                                                  |
| Chen et al., 2017         | 35                   | 31                 | LOO     | SVM                | 0.80                 | 0.87                 | 15.6          | 15.4         | 43%                   | 58%                  | 0              | 20.4           | 20.9           | 74.6        | <2yrs                     | 3T Siemens Tim-Trio          | 2000/30    | NA           | 8            | DN- FES                 | I<br>o                                                                  |
| Guo et al., 2017          | 35                   | 31                 | LOO     | SVM                | 0.92                 | 0.95                 | 22.93         | 23.28        | 35%                   | 50%                  | NA             | 22.68          | 21.18          | 88.11       | 24.14                     | 3T Siemens Trio              | 2000/30    | Varied       | 8            | SCZ                     | I                                                                       |
| Skatun et al., 2017       | 52                   | 30                 | LOSO    | LDA                | 0.80                 | 0.75                 | 30            | 27.3         | 37%                   | 50%                  | NA             | 18.8           | 17.4           | 74.4        | 16.08                     | 3T GE Signa                  | 2000/27    | 1711         | 6            | SCZ                     | E<br>Dataset KaSP,<br>TOP, Hubin<br>Pooled ♦                            |
| Cui et al., 2018          | 56                   | 55                 | 10 Fold | SVM                | 0.88 (I)<br>0.78 (E) | 0.76 (I)<br>0.81 (E) | 23            | 32           | 46%                   | 52%                  | NA             | 22             | 20             | 85          | 14                        | 3T GE Discovery              | 2000/30    | 32           | 6            | FES                     | I/E<br>o                                                                |
| Huang et al., 2018        | 41                   | 23                 | LOO     | SVM                | 0.90                 | 0.65                 | 23.51         | 25.61        | 46%                   | 43%                  | NA             | 25.78          | 24.76          | 107.77      | 11.25                     | 3T Siemens Magnetom Tim-Trio | 2000/30    | 6670         | 10           | FES                     | I<br>Data from Cui et al 2017<br>o                                      |
| Kottaram et al., 2018     | 41                   | 41                 | 10 Fold | SVM                | 0.87                 | 0.79                 | 40.9          | 38.3         | 31%                   | 41%                  | 615.4          | 15.6           | 16.4           | 59.1        | 214.8                     | 3T Siemens Tim-Trio          | 2000/40    | 4005         | 8            | Treatment Resistant SCZ | I<br>o                                                                  |
| Moghimi et al., 2018      | 82                   | 88                 | Nested  | SVM                | 0.60                 | 0.75                 | 31.35         | 31.75        | 30%                   | 30%                  | NA             | NA             | NA             | NA          | NA                        | 3T Siemens Trio              | 2000/30    | 1618         | 6            | FES+SCZ                 | I                                                                       |
| Zeng et al., 2018         | 474                  | 607                | LOO     | SVM+many           | 0.79 (I)<br>0.76 (E) | 0.82 (I)<br>0.76 (E) | NA            | NA           | NA                    | NA                   | NA             | NA             | NA             | NA          | NA                        | 1.5-3T                       | Varied     | Varied       | Varied       | SCZ                     | I/E<br>Xijing, AMU,<br>Xiangya,<br>Cobre,<br>WUSTL<br>Pooled            |
| Zhu et al., 2018          | 24                   | 21                 | LOO     | KDA                | 0.90                 | 0.7                  | 30.78         | 35.29        | 58%                   | 71%                  | NA             | NA             | NA             | 97.83       | NA                        | 3T Siemens Tim-Trio          | 2000/30    | NA           | 5            | SCZ                     | I<br>Deep<br>o                                                          |
| Ji et al., 2019           | 230                  | 185                | LOO     | KNN                | 0.8 (I)<br>0.74 (E)  | 0.72 (I)<br>0.67 (E) | NA            | NA           | NA                    | NA                   | NA             | NA             | NA             | NA          | NA                        | 3T                           | Varied     | 35788        | Varied       | SCZ                     | I/E<br>AMU1 and 2,<br>SWU, NKI,<br>Cobre<br>Pooled                      |
| Jing et al., 2019         | 42                   | 40                 | LOO     | SVM                | 0.88 (I)<br>0.72 (E) | 0.8 (I)<br>0.82 (E)  | 29.2          | 26.5         | 37%                   | 52%                  | 464.08         | 21.8           | 19.5           | 78.9        | 83.04                     | 3T GE                        | 2000/30    | NA           | 8            | SCZ                     | I/E<br>o                                                                |
| Matsubara et al., 2019    | 48                   | 117                | 10 Fold | DNGM               | 0.52                 | 0.79                 | 36.2          | 31           | 22%                   | 40%                  | NA             | NA             | NA             | NA          | NA                        | 3T Siemens                   | 2000/30    | NA           | 5            | SCZ                     | I<br>UCLA Dataset<br>Deep                                               |
| Yan et al., 2019          | 558                  | 542                | K Fold  | RNN                | 0.77 (I)<br>0.78 (E) | 0.76 (I)<br>0.73 (E) | NA            | NA           | NA                    | NA                   | NA             | NA             | NA             | NA          | NA                        | 3T                           | Varied     | NA           | Varied       | SCZ                     | I/E<br>W. China<br>Dataset<br>Deep                                      |
| Yang et al., 2019         | 153                  | 250                | K Fold  | CNE                | 0.64                 | 0.82                 | NA            | NA           | NA                    | NA                   | NA             | NA             | NA             | NA          | NA                        | 1.5-3T                       | Varied     | Varied       | Varied       | SCZ                     | I<br>Cobre, UCLA,<br>WUSTL<br>Deep<br>Pooled                            |
| Zhu et al., 2019          | 439                  | 426                | LOO     | DAN                | 0.81                 | 0.84                 | NA            | NA           | NA                    | NA                   | NA             | NA             | NA             | NA          | NA                        | 1.5-3T                       | Varied     | 16200        | Varied       | SCZ                     | I<br>Huaxi, NBH,<br>Cobre,<br>Nottingham,<br>Taiwan,<br>Xiangya<br>Deep |

|                        |     |     |         |               |                      |                      |       |       |       |       |        |       |       |       |       |                              |         |        |        |        |                                                              |                                                            |
|------------------------|-----|-----|---------|---------------|----------------------|----------------------|-------|-------|-------|-------|--------|-------|-------|-------|-------|------------------------------|---------|--------|--------|--------|--------------------------------------------------------------|------------------------------------------------------------|
| Lei et al., 2020       | 295 | 452 | LOO     | CNN           | 0.79                 | 0.82                 | NA    | NA    | NA    | NA    | NA     | NA    | NA    | NA    | NA    | NA                           | 1.5-3T  | Varied | 4005   | Varied | SCZ                                                          | I<br>Cobre, UCLA, Maastricht, Dublin, W. China Deep Pooled |
| Lei et al., 2020b      | 295 | 452 | K Fold  | SVM           | 0.45                 | 0.72                 | NA    | NA    | NA    | NA    | NA     | NA    | NA    | NA    | NA    | NA                           | 1.5-3T  | Varied | NA     | Varied | Scz                                                          | I<br>Cobre, UCLA, Maastricht, Dublin, W. China Deep Pooled |
| Liu et al., 2020       | 38  | 38  | LOO     | SVM           | 0.74                 | 0.91                 | 26.3  | 25.4  | 50%   | 50%   | NA     | 21.5  | 44.1  | NA    | 32.64 | 3T Siemens Magnetom Tim-Trio | 2000/30 | 19900  | 6.5    | FES    | I<br>o                                                       |                                                            |
| Wang et al., 2020      | 60  | 71  | K Fold  | MCN           | 0.70                 | 0.68                 | NA    | NA    | NA    | NA    | NA     | NA    | NA    | NA    | NA    | 3T Siemens Trio              | 2000/29 | 6670   | 5      | SCZ    | I<br>Cobre Dataset Deep                                      |                                                            |
| Xiang et al., 2020     | 71  | 74  | LOO     | SVM           | 0.92                 | 0.93                 | 38.1  | 35.8  | 19.7% | 31.1% | 352.6  | 15    | 14.8  | NA    | NA    | 3T Siemens TIM               | 2000/29 | NA     | 5      | SCZ    | I<br>Cobre Dataset                                           |                                                            |
| Yoshihara et al., 2020 | 114 | 175 | LOO     | SLR           | 0.72 (I)<br>0.71 (E) | 0.79 (I)<br>0.71 (E) | NA    | NA    | NA    | NA    | NA     | NA    | NA    | NA    | NA    | 1-3T MRI system              | Varied  | 73     | Varied | SSD    | I/E<br>Testing Cobre, TOP, JHU (Training) Kyoto dataset<br>o |                                                            |
| Zhao et al., 2020      | 558 | 542 | K Fold  | GAN           | 0.73 (I)<br>0.71 (E) | 0.72 (I)<br>0.71 (E) | NA    | NA    | NA    | NA    | NA     | NA    | NA    | NA    | NA    | 3T                           | Varied  | NA     | Varied | SCZ    | I/E<br>W. China Dataset Deep                                 |                                                            |
| Zhu et al., 2020       | 72  | 75  | K Fold  | Forest        | 0.62                 | 0.54                 | NA    | NA    | NA    | NA    | NA     | NA    | NA    | NA    | NA    | 3T                           | Varied  | 6786   | Varied | SCZ    | I<br>Cobre, UCLA                                             |                                                            |
| Gallos et al., 2021    | 72  | 74  | K Fold  | ML            | 0.57                 | 0.73                 | NA    | NA    | NA    | NA    | NA     | NA    | NA    | NA    | NA    | 3T Siemens Trio              | 2000/29 | NA     | 5      | SCZ    | I<br>Cobre Deep                                              |                                                            |
| Lee et al., 2021       | 220 | 220 | 10 Fold | SVM           | 0.86                 | 0.83                 | 31.7  | 31.8  | 45%   | 50%   | NA     | 15.1  | 17.4  | 66.33 | 112.8 | 3T GE                        | 2500/30 | NA     | 8      | SCZ    | I                                                            |                                                            |
| Serin et al., 2021     | 12  | 15  | 10 Fold | Decision Tree | 0.92                 | 0.87                 | 32.8  | 33.3  | 16%   | 6%    | NA     | NA    | NA    | NA    | NA    | 1.5T GE Signa                | 2000/40 | 2701   | 17     | SCZ    | E<br>Dataset from Zalesky et al., 2010                       |                                                            |
| Lei et al., 2022       | 505 | 907 | LOO     | CNN           | 0.74 (I)<br>0.73 (E) | 0.97 (I)<br>0.67 (E) | NA    | NA    | NA    | NA    | NA     | NA    | NA    | NA    | NA    | 1.5-3T                       | Varied  | 6670   | Varied | SCZ    | I/E<br>Huaxi, UCLA, Dublin, Maastricht, Cobre Deep Pooled    |                                                            |
| Oh et al., 2022        | 171 | 161 | 10 Fold | CNN           | 0.83                 | 0.83                 | 34.38 | 33.73 | 47%   | 54%   | 449.33 | 13.69 | 11.57 | 50.05 | 77.7  | 3T Verio                     | 2000/30 | 6670   | 5      | SSD    | I<br>Deep                                                    |                                                            |
| Yuan et al., 2022      | 53  | 67  | K Fold  | SVM           | 0.64                 | 0.55                 | 36.7  | 34.8  | 20%   | 31%   | NA     | NA    | NA    | NA    | NA    | 3T Siemens Trio              | 2000/29 | 6670   | 5      | SCZ    | I<br>Cobre                                                   |                                                            |

**Supplemental Table 3.** FC datasets Statistical method: SVM = Support vector machine. KNN = K nearest neighbors. FES = First Episode Schizophrenia, SCZ = Schizophrenia. SSD = Schizophrenia Spectrum Disorder. LOO = leave one out TTS = train test split. KDA= kernel discriminant analysis. GAN = generative adversarial network modeling. DN-FES = drug naïve first episode schizophrenia. PCA = principle component analysis. TR = repetition time TE = echo time. CV = cross validation. OAR = one against rest. LAAM = lattice auto-associative memories. TR = repetition time. TE = echo time. CNN = convolutional neural network. DNN = deep neural network. DAN = discriminant autoencoder network. RNN = recurrent neural network. DNGM = deep neural generative model. CNE = capsule network ensemble. MCN = multikernel capsule network model. ML = manifold learning. LOSO = leave one site out. NN= neural network. E = external data used for testing. I = internal training folds used for testing. JHU = Johns Hopkins first episode schizophrenia cohort. TOP = The outcome of Psychosis and Fitness Therapy, University Medical Centre. Utrecht. SLR = sparse logistic regression. Deep = manuscripts that use a form of deep learning. Pooled = data was pooled together for model training. ♦ indicates the pooled dataset did not overlap and was used for the primary analysis. ° = manuscript was kept in the secondary analysis after outlier exclusion.

| Study                 | Psychosis Sample (N) | Control Sample (N) | Imaging                                                                                       | CV      | Statistical Method | Sensitivity          | Specificity          | Age Psychosis | Age Controls | Gender Psychosis (%F) | Gender Controls (%F) | CPZ Equivalent | PANSS Positive | PANSS Negative | PANSS Total | Illness Duration (months) | MRI Scanner                  | T1 (TR/TE) (ms)                 | rsfMRI (TR/TE) | DTI (TR/TE) | Feature Size | Address Motion (DTI)                                                                                | Minutes Rest | Diagnosis | Notes                                                 |
|-----------------------|----------------------|--------------------|-----------------------------------------------------------------------------------------------|---------|--------------------|----------------------|----------------------|---------------|--------------|-----------------------|----------------------|----------------|----------------|----------------|-------------|---------------------------|------------------------------|---------------------------------|----------------|-------------|--------------|-----------------------------------------------------------------------------------------------------|--------------|-----------|-------------------------------------------------------|
| Cabral et al., 2016   | 71                   | 74                 | FC, GMV                                                                                       | K fold  | SVM                | 0.78                 | 0.71                 | 38.1          | 35.8         | 19.7%                 | 31.1%                | 352.6          | 15             | 14.8           | NA          | NA                        | 3T Siemens TIM               | 2530/(1.64,3.5,5.36,7.22,9.0-8) | 2000/29        | NA          | NA           | NA                                                                                                  | 5            | SCZ       | I<br>Cobre Dataset                                    |
| Qureshi et al., 2017  | 72                   | 72                 | FC, cortical thickness, surface area, GMV, WMV                                                | K fold  | SVM                | 0.98                 | 0.98                 | 38.1          | 35.8         | 27%                   | 19%                  | NA             | 14.96          | 14.53          | 58.71       | 108.36                    | 3T Siemens TIM               | 2530/(1.64,3.5,5.36,7.22,9.0-8) | 2000/29        | NA          | 748          | NA                                                                                                  | 5            | SCZ       | I<br>Cobre Dataset                                    |
| Guo et al., 2018      | 161                  | 168                | FC, GMV, WMV, FA, MD, RD                                                                      | 10 Fold | SVM                | 0.85                 | 0.86                 | 44.99         | 43.17        | 59%                   | 57%                  | NA             | 9.6            | 9.96           | 40.3        | 214.32                    | 3T Siemens Magnetom Tim-Trio | 3500/3.5                        | 2500/27        | 11000/104   | 94           | ECC                                                                                                 | 8            | SCZ       | I                                                     |
| Lee et al., 2018      | 47                   | 23                 | FA, GMV, WMV                                                                                  | LOO     | SVM                | 0.89                 | 0.95                 | 28.68         | 29.7         | 62%                   | 65%                  | 337.5          | 15.91          | 16.77          | 61.11       | 12.24                     | 3T Philips Achieva           | 9/4.6                           | NA             | 5422/70     | 504          | NA                                                                                                  | NA           | SCZ       | I                                                     |
| Liang et al., 2019    | 54                   | 48                 | FA, MD, GMV, cortical thickness, gyrification                                                 | K fold  | Tree               | 0.72                 | 0.78                 | 24.8          | 25.25        | 66%                   | 66%                  | 0              | NA             | NA             | 93.49       | 17.89                     | 3T Signa Excite              | 8.5/3.4                         | NA             | 10000/70.8  | 48           | ECC                                                                                                 | NA           | FES       | I<br>o                                                |
| Qureshi et al., 2019  | 72                   | 72                 | FC, ICA                                                                                       | K fold  | CNN                | 0.98                 | 0.97                 | 38.1          | 35.8         | 27%                   | 19%                  | NA             | 14.96          | 14.53          | 58.71       | 108.36                    | 3T Siemens TIM               | 2530/(1.64,3.5,5.36,7.22,9.0-8) | 2000/29        | NA          | Varied       | NA                                                                                                  | 5            | SCZ       | I<br>Cobre Dataset<br>Deep                            |
| Zhuang et al., 2019   | 40                   | 29                 | FA, MD, cortical thickness, GMV, surface area, mean curvature, curvature index, folding index | 10 Fold | MK-SVM             | 0.94                 | 0.66                 | 27.13         | 27.03        | 45%                   | 51%                  | 0              | NA             | NA             | 73.54       | 6.51                      | 3T Siemens Verio             | 2530/3.65                       | 2000/30        | 10200/90    | 78489        | ECC                                                                                                 | 6            | DN-FES    | I<br>o                                                |
| Masoudi et al., 2020  | 64                   | 81                 | FA, MD, MO, FC                                                                                | K fold  | CNN                | 0.99                 | 0.97                 | 38.92         | 37.98        | 20%                   | 25%                  | NA             | NA             | NA             | NA          | NA                        | 3T Siemens TIM               | 2530/(1.64,3.5,5.36,7.22,9.0-8) | 2000/29        | 9000/84     | Varied       | ECC                                                                                                 | 5            | SCZ       | I<br>Cobre Dataset<br>Deep                            |
| Zhao et al., 2020a    | 135                  | 148                | FC, FA, GMV                                                                                   | 10 fold | SVM                | 0.90                 | 0.92                 | 43.9          | 41.9         | 58%                   | 56%                  | 468.8          | 9.5            | 9.8            | 39.8        | 196.8                     | 3T Siemens Magnetom Tim-Trio | 3500/3.5                        | 2500/27        | 11000/104   | 131          | ECC                                                                                                 | 8            | SCZ       | I                                                     |
| Faria et al., 2021    | 87                   | 62                 | FA, MD, GMV, WMV, FC                                                                          | LOO     | SIFA               | 0.80                 | 0.45                 | 22.5          | 23.4         | 28%                   | 30%                  | 381            | NA             | NA             | NA          | 13.2                      | 3T                           | 6700/3.1                        | 2000/30        | 8500/61     | 12309        | Orientation and homogeneity correction                                                              | 7            | FEP       | I<br>Dataset from Kamath et al., 2018<br>o            |
| Lin et al., 2021      | 49                   | 122                | FA, FC, VBM GMD KSL                                                                           | 10 fold | MK-SVM             | 0.93 (I)<br>0.70 (E) | 0.96 (I)<br>0.60 (E) | 36.13         | 31.59        | 24%                   | 46%                  | NA             | NA             | NA             | NA          | NA                        | 3T Siemens Magnetom Tim-Trio | 2530/3.44                       | 2000/30        | 7000/92     | 60           | ECC                                                                                                 | 8            | SCZ       | I/E<br>UCLA dataset                                   |
| Rodrigue et al., 2021 | 414                  | 288                | FA, FC                                                                                        | TTS 20% | Ridge              | 0.51 (I)<br>0.47 (E) | 0.52 (I)<br>0.47 (E) | 35            | 37.1         | 42%                   | 51%                  | NA             | NA             | NA             | NA          | NA                        | NA                           | NA                              | NA             | NA          | 31145        | Motion and ECC                                                                                      | NA           | SCZ       | I/E<br>Dataset ISMMS Olin BSNIP-1 BSNIP-2 Pooled<br>♦ |
| Hu et al., 2022       | 148                  | 76                 | GMV, WMV, CSF, FA, MD                                                                         | 10 Fold | CNN                | 0.86 (I)<br>0.64 (E) | 0.56 (I)<br>0.63 (E) | 32.72         | 31.33        | 31%                   | 38%                  | NA             | NA             | NA             | NA          | NA                        | 3T Philips Achieva           | 7200/3.2                        | NA             | 3725/63     | NA           | ECC reference to b0, inspection of signal dropout and artifacts. Exclusion of subjects with >3mm FD | NA           | SCZ       | I/E<br>IMH Dataset<br>Deep<br>o                       |
| Wang et al., 2022     | 79                   | 205                | FC, FA, GMV                                                                                   | 10 fold | SVM                | 0.57                 | 0.84                 | 33.21         | 32.52        | 68%                   | 53%                  | NA             | 22.47          | 23.22          | 85.23       | >2years                   | 3T Philips Achieva           | 8.2/3.8                         | 2000/30        | 6000/70     | 937          | ECC                                                                                                 | 7            | SCZ       | I<br>o                                                |

**Supplemental Table 4.** Multimodal datasets Statistical method: SVM = Support vector machine. FES = first episode schizophrenia (no medication) DN-FES = drug naïve first episode schizophrenia. LOO = leave one out. TTS = train test split. SIFA = supervised integrated factor analysis. MK = multi kernel. FA = fractional anisotropy. MD = mean diffusivity. GMV = gray matter volume. WMV = white matter volume. RD = radial diffusivity. FEP = first episode psychosis. SCZ = schizophrenia. CV = cross validation. GMV = gray matter volume. VBM GMD KSL = voxel based morphometry gray matter density using Kullback-Leibler divergence-based similarity values. ECC = eddy current correction. CNN = convolutional neural network. ICA: independent component analysis. MO = mode of anisotropy. E = external data used for testing. I = internal training folds used for testing. Deep = manuscripts that use a form of deep learning. Pooled = data was pooled together for model training. ♦ indicates that pooled dataset did not overlap and was used for the primary analysis. o = manuscript was kept in the secondary analysis after outlier exclusion.

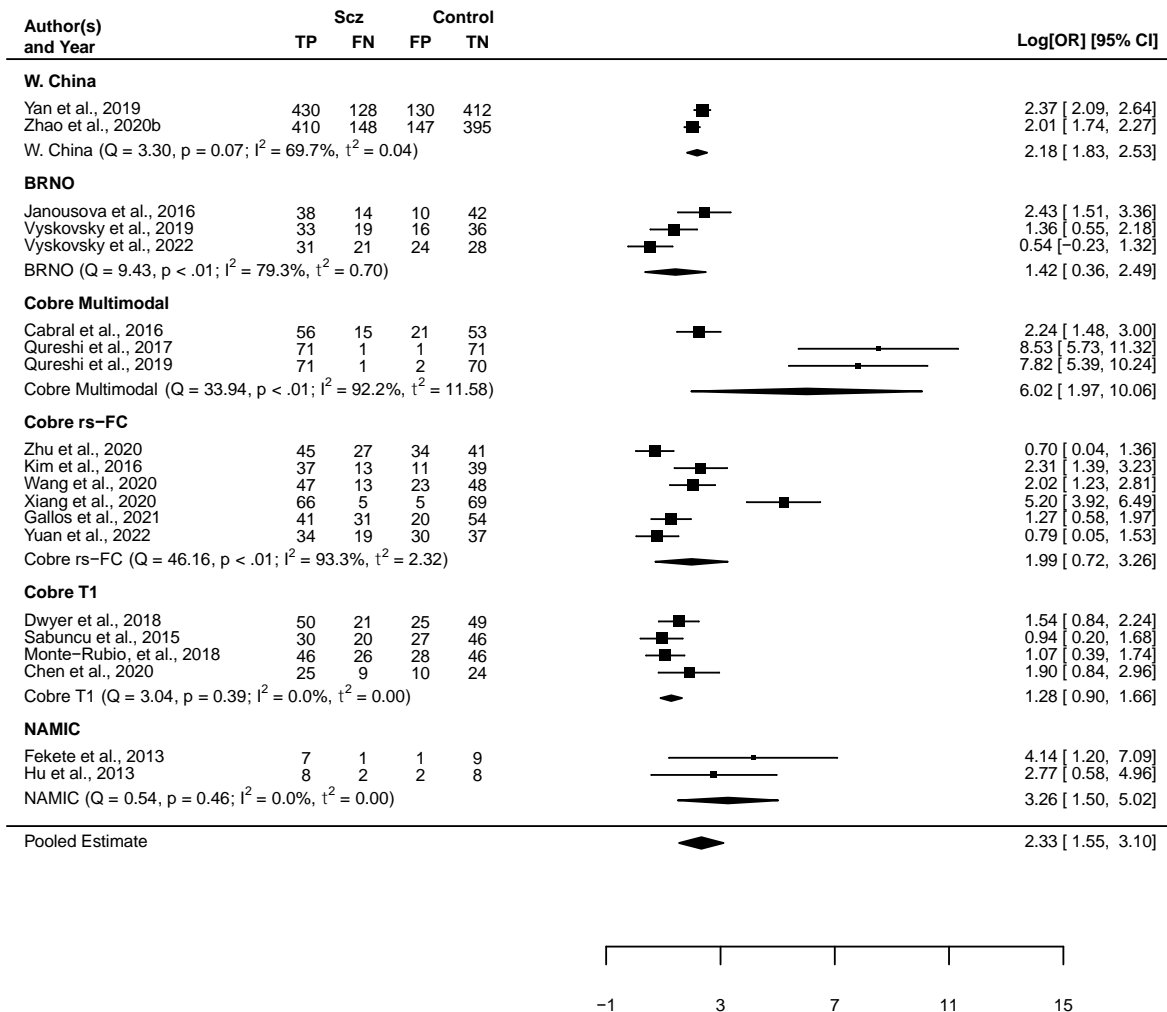

Supplemental Figure 1. Forest plot from studies used to construct a combined dataset score. To avoid potential type 1 errors with the main analysis. We calculated average classification scores using studies with the same dataset and imaging type. To highlight the range of classification scores we have grouped each study together.

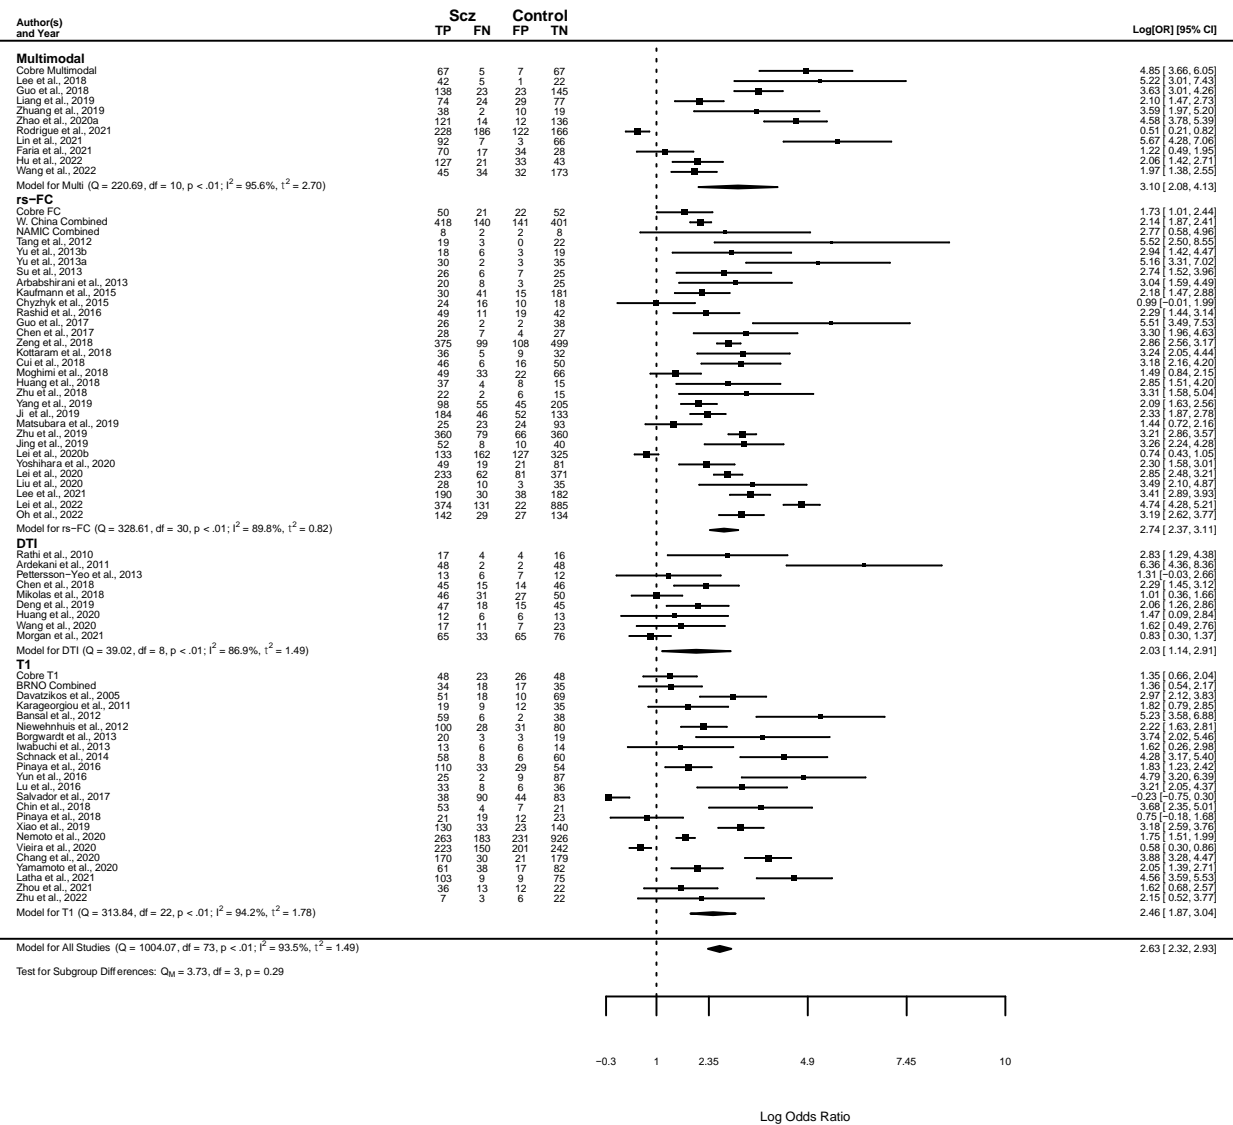

Supplemental Figure 2. Comparison of forest plot for log diagnostic odds ratio by imaging groups including studies that apply pooled datasets. Multimodal: classification that used at least two of the following: rs-FC, T1, and/or DTI as features. RS-FC: resting state functional connectivity. DTI: diffusion tensor imaging. T1: T1 weighted imaging. The point size of squares and polygons are a function of the precision of the estimates.



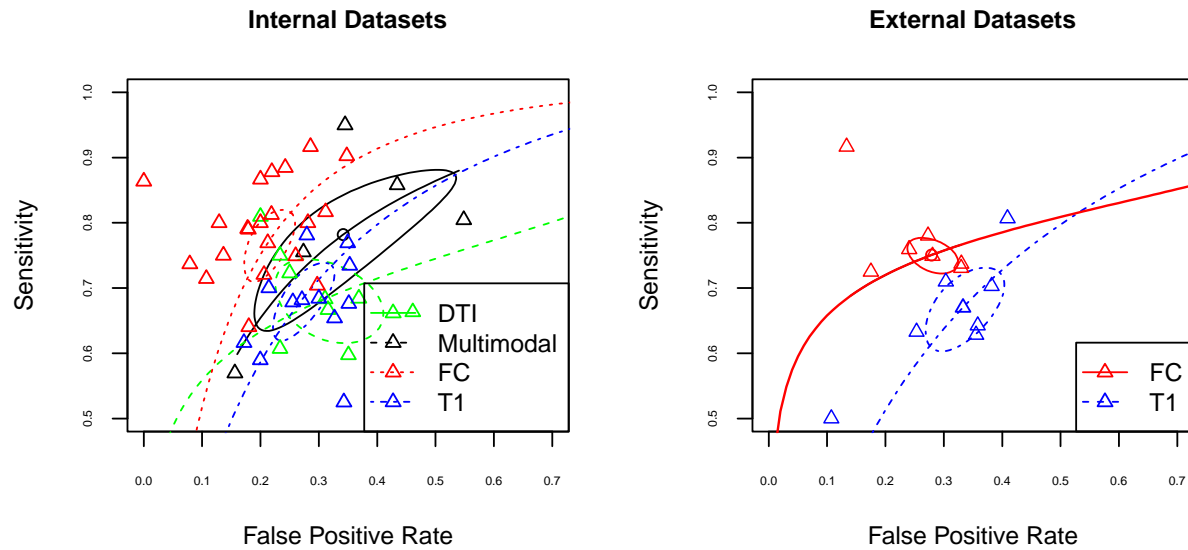

Supplemental Figure 3. Sensitivity plots of psychosis classification performance after the exclusion of outlier studies, when tested on independent internal (left; i.e., cross-validation) and external (right) datasets. In this case, large studies with pooled (repeated) datasets were included. Colors represent different imaging modalities; estimated summary receiver operating curves are shown overlaid for each of the imaging modalities with respective confidence interval regions surrounding mean sensitivity and specificity values. A significance difference was found between rs-FC (red) and DTI (green) when classification was tested using internal datasets (left). Within the external datasets (right), the rs-FC group provides a slight advantage relative to the T1 (blue) group.

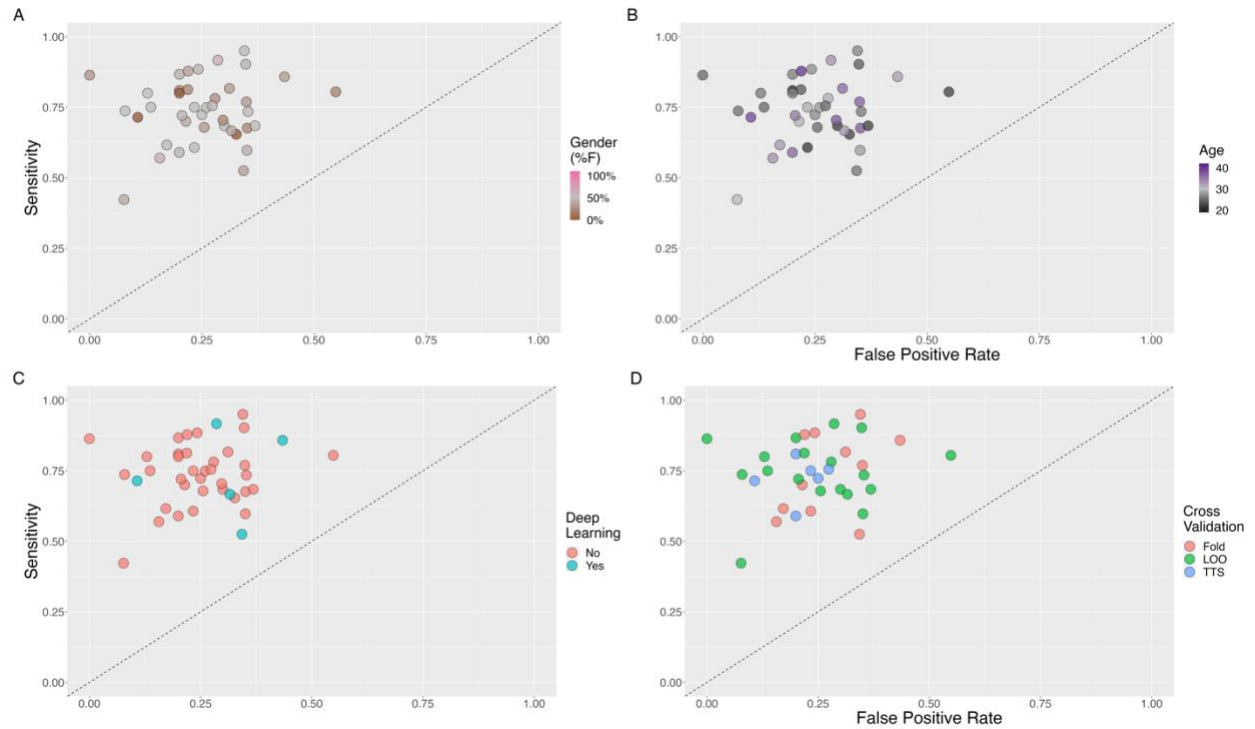

Supplemental Figure 4. Sensitivity plots of internal dataset psychosis classification performance and demographic variables after the exclusion of outlier studies, with results broken down by different demographic or analysis variables. Demographic plots are divided by (A) gender as represented via the percentage of females represented in the sample, (B) the mean age of the sample size. No obvious trends were seen for differences based on these two demographic characteristics. We also re-examined results based on (C) the method used for classification (contrasting simplified non deep and deep learning methods), and (D) the cross validation strategy used (e.g. Fold = K folds, LOO = leave one out, TTS = train test split). We again, did not find differences in classification performance based on these analysis variables.
